# Supplementary material for: The intergenerational learning effects of a home study program for elementary and junior high school children on knowledge and awareness of plastic consumption
Source: Springer Nature journal article supplement (doi:10.1007/s10163-024-01962-2), 2024-05-01
Supplement: MOESM1 [file 27045054]

## Appendix 1

Cross analysis figures for IGL effects. The following figures are derived from the post questionnaire of the parents. Data is considered after removing outliers.

Social Issues Conversation by Child's Behavior

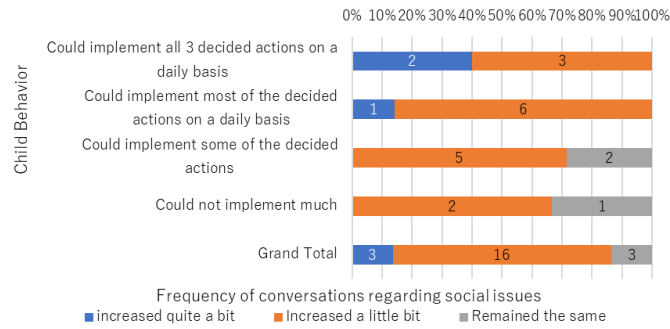

Figure 1. Cross analysis of child' behavior and frequency of social issues-based conversation (n=20)

Social Issues Conversation by Parents' Behavior

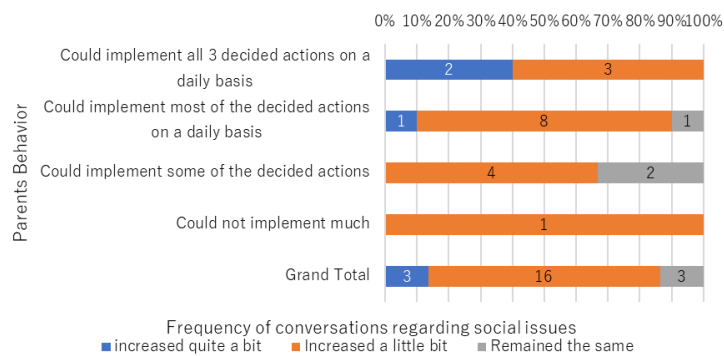

Figure 2. Cross analysis of parents' behavior and frequency of social issues-based conversation (n=20)

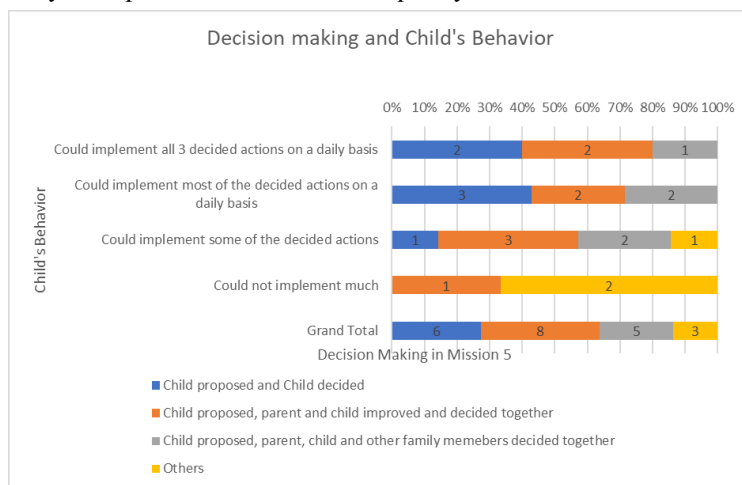

Figure 3. Child's behavior and decision making (n=20)
